# Supplementary material for: Kinesin KIFC1 actively transports bare double-stranded DNA
Source: PubMed Central journal article supplement — Nucleic Acids Res. 2013 Mar 29;41(9):4926–37. doi: 10.1093/nar/gkt204 (PMC3643607; doi:10.1093/nar/gkt204), 2013-03-29
Supplement: supp_gkt204_nar-03189-c-2012-File008.pdf [file supp_gkt204_nar-03189-c-2012-File008.pdf]

## SUPPLEMENTARY DATA

Table S1. List of proteins identified by mass spectrometry in three biological replicates (three independent screening experiments with slightly different conditions: Gel1 and Gel2: without detergent, Gel 3: with 0.1% detergent). Hits are represented according to the number of peptides identified with a false discovery rate of all peptide and protein identifications set to less than 1 % (FDR<1%).

| Identifier (Swiss-Prot) | Gel1     | Gel2      | Gel3     | MW (Kda)     | Description                                                    |
|-------------------------|----------|-----------|----------|--------------|----------------------------------------------------------------|
| MSH3_HUMAN              |          | 22        | 31       | 127,4        | DNA mismatch repair protein Msh3 <i>Homo sapiens</i>           |
| <b>KIF4A_HUMAN</b>      |          | <b>18</b> | <b>9</b> | <b>139,9</b> | <b>Chromosomeassociated kinesin KIF4A Homo sapiens</b>         |
| SYDM_HUMAN              |          | 16        |          | 73,6         | AspartatetRNA ligase, mitochondrial Homo sapiens               |
| TCRG1_HUMAN             | 3        | 13        | 3        | 123,9        | Transcription elongation regulator 1 <i>Homo sapiens</i>       |
| CKAP5_HUMAN             |          | 12        | 10       | 225,5        | Cytoskeletonassociated protein 5 Homo sapiens                  |
| DIP2B_HUMAN             |          | 10        |          | 171,5        | Discointeracting protein 2 homolog B Homo sapiens              |
| CTND1_HUMAN             | 8        | 9         |          | 108,2        | Catenin delta1 Homo sapiens                                    |
| NCKP1_HUMAN             |          | 9         |          | 128,8        | Nckassociated protein 1 Homo sapiens                           |
| TYDP1_HUMAN             | 12       | 8         | 7        | 68,4         | TyrosylDNA phosphodiesterase 1 Homo sapiens                    |
| EWS_HUMAN               | 10       | 7         | 11       | 68,5         | RNAbinding protein EWS Homo sapiens                            |
| <b>KIFC1_HUMAN</b>      | <b>9</b> | <b>7</b>  | <b>7</b> | <b>73,7</b>  | <b>Kinesinlike protein KIFC1 Homo sapiens</b>                  |
| SHOT1_HUMAN             | 3        | 7         | 5        | 71,6         | Shootin1 Homo sapiens                                          |
| AHNAK2_HUMAN            |          | 7         |          | 616,6        | Protein AHNAK2 <i>Homo sapiens</i>                             |
| DDX1_HUMAN              | 8        | 6         | 23       | 82,4         | ATPdependent RNA helicase DDX1 Homo sapiens                    |
| AP3B1_HUMAN             |          | 6         |          | 121,3        | AP3 complex subunit beta1 Homo sapiens                         |
| UBP28_HUMAN             |          | 6         |          | 122,5        | Ubiquitin carboxylterminal hydrolase 28 Homo sapiens           |
| PRRC2C_HUMAN            |          | 5         | 29       | 316,9        | Protein PRRC2C <i>Homo sapiens</i>                             |
| AP3D1_HUMAN             |          | 5         |          | 130,2        | AP3 complex subunit delta1 Homo sapiens                        |
| ARHG5_HUMAN             |          | 5         |          | 176,8        | Rho guanine nucleotide exchange factor 5 <i>Homo sapiens</i>   |
| LR16A_HUMAN             |          | 5         |          | 151,6        | Leucinerich repeatcontaining protein 16A Homo sapiens          |
| RPOM_HUMAN              |          | 5         |          | 138,6        | DNAdirected RNA polymerase, mitochondrial Homo sapiens         |
| SK2L2_HUMAN             |          | 5         |          | 117,8        | Superkiller viralicidic activity 2like 2 Homo sapiens          |
| STK10_HUMAN             |          | 5         |          | 112,1        | Serine/threonineprotein kinase 10 Homo sapiens                 |
| THYN1_HUMAN             | 20       | 4         | 9        | 25,7         | Thymocyte nuclear protein 1 <i>Homo sapiens</i>                |
| HNRPD_HUMAN             | 18       | 4         |          | 38,4         | Heterogeneous nuclear ribonucleoprotein D0 <i>Homo sapiens</i> |
| SAMD1_HUMAN             | 6        | 4         |          | 56,1         | Atherin <i>Homo sapiens</i>                                    |
| ERF_HUMAN               | 3        | 4         |          | 58,7         | ETS domaincontaining transcription factor ERF Homo sapiens     |
| SWP70_HUMAN             |          | 4         |          | 69           | Switchassociated protein 70 Homo sapiens                       |
| MAP1S_HUMAN             |          | 4         |          | 112,2        | Microtubuleassociated protein 1S Homo sapiens                  |
| FANCI_HUMAN             |          | 4         |          | 149,3        | Fanconi anemia group I protein <i>Homo sapiens</i>             |
| KCD14_HUMAN             |          | 4         |          | 29,6         | BTB/POZ domaincontaining protein KCTD14 Homo sapiens           |
| TPMT_HUMAN              |          | 4         |          | 28,2         | Thiopurine Smethyltransferase Homo sapiens                     |
| CN166_HUMAN             | 6        | 3         | 6        | 28,1         | UPF0568 protein C14orf166 <i>Homo sapiens</i>                  |
| SBDS_HUMAN              |          | 3         | 6        | 28,8         | Ribosome maturation protein SBDS <i>Homo sapiens</i>           |
| FEN1_HUMAN              | 26       | 3         | 4        | 42,6         | Flap endonuclease 1 <i>Homo sapiens</i>                        |
| FLII_HUMAN              |          | 3         | 4        | 144,8        | Protein flightless1 homolog Homo sapiens                       |
| ETHE1_HUMAN             |          | 3         | 3        | 27,9         | Protein ETHE1, mitochondrial <i>Homo sapiens</i>               |
| RPC2_HUMAN              |          | 3         | 3        | 127,8        | DNAdirected RNA polymerase III subunit RPC2 Homo sapiens       |

|             |    |   |    |       |                                                                                                              |
|-------------|----|---|----|-------|--------------------------------------------------------------------------------------------------------------|
| NUMB_HUMAN  | 10 | 3 |    | 70,8  | Protein numb homolog <i>Homo sapiens</i>                                                                     |
| HOP2_HUMAN  | 5  | 3 |    | 24,9  | Homologouspairing protein 2 homolog Homo sapiens                                                             |
| BDH2_HUMAN  | 4  | 3 |    | 26,7  | 3hydroxybutyrate dehydrogenase type 2 Homo sapiens                                                           |
| K0907_HUMAN | 3  | 3 |    | 64,8  | UPF0469 protein KIAA0907 <i>Homo sapiens</i>                                                                 |
| NEP1_HUMAN  | 3  | 3 |    | 26,7  | Ribosomal RNA small subunit methyltransferase NEP1 <i>Homo sapiens</i>                                       |
| SUMO2_HUMAN | 3  | 3 |    | 10,9  | Small ubiquitinrelated modifier 2 Homo sapiens                                                               |
| CD2AP_HUMAN |    | 3 |    | 71,5  | CD2associated protein Homo sapiens                                                                           |
| I2BPL_HUMAN |    | 3 |    | 82,7  | Interferon regulatory factor 2binding proteinlike Homo sapiens                                               |
| PAPS1_HUMAN |    | 3 |    | 70,8  | Bifunctional 3'phosphoadenosine 5'phosphosulfate synthase 1 Homo sapiens                                     |
| ANM5_HUMAN  |    | 3 |    | 72,7  | Protein arginine Nmethyltransferase 5 Homo sapiens                                                           |
| DCNL1_HUMAN |    | 3 |    | 30,1  | DCN1like protein 1 Homo sapiens                                                                              |
| DIAP3_HUMAN |    | 3 |    | 136,9 | Protein diaphanous homolog 3 <i>Homo sapiens</i>                                                             |
| HDAC4_HUMAN |    | 3 |    | 119   | Histone deacetylase 4 <i>Homo sapiens</i>                                                                    |
| PERQ1_HUMAN |    | 3 |    | 114,6 | PERQ amino acidrich with GYF domaincontaining protein 1 Homo sapiens                                         |
| RB3GP_HUMAN |    | 3 |    | 110,5 | Rab3 GTPaseactivating protein catalytic subunit Homo sapiens                                                 |
| NUMA1_HUMAN |    |   | 89 | 238,3 | Nuclear mitotic apparatus protein 1 <i>Homo sapiens</i>                                                      |
| DNLI3_HUMAN |    |   | 68 | 112,9 | DNA ligase 3 <i>Homo sapiens</i>                                                                             |
| HLTF_HUMAN  |    |   | 67 | 113,9 | Helicase like transcription factor Homo sapiens                                                              |
| HELC1_HUMAN |    |   | 46 | 251,5 | Activating signal cointegrator 1 complex subunit 3 <i>Homo sapiens</i>                                       |
| UBF1_HUMAN  |    |   | 44 | 89,4  | Nucleolar transcription factor 1 <i>Homo sapiens</i>                                                         |
| HNRPU_HUMAN | 35 |   | 37 | 90,6  | Heterogeneous nuclear ribonucleoprotein U <i>Homo sapiens</i>                                                |
| DIDO1_HUMAN |    |   | 36 | 243,9 | Deathinducer obliterator 1 Homo sapiens                                                                      |
| KIF14_HUMAN |    |   | 36 | 186,5 | Kinesinlike protein KIF14 Homo sapiens                                                                       |
| TTF2_HUMAN  |    |   | 34 | 129,6 | Transcription termination factor 2 <i>Homo sapiens</i>                                                       |
| NONO_HUMAN  |    |   | 33 | 54,2  | NonPOU domaincontaining octamerbinding protein Homo sapiens                                                  |
| ZN638_HUMAN |    |   | 32 | 220,6 | Zinc finger protein 638 <i>Homo sapiens</i>                                                                  |
| DNMT1_HUMAN | 3  |   | 28 | 183,2 | DNA (cytosine5)methyltransferase 1 Homo sapiens                                                              |
| UHRF1_HUMAN | 19 |   | 27 | 89,8  | E3 ubiquitinprotein ligase UHRF1 Homo sapiens                                                                |
| SMAL1_HUMAN |    |   | 26 | 105,9 | SWI/SNFrelated matrixassociated actindependent regulator of chromatin subfamily Alike protein 1 Homo sapiens |
| CHD1L_HUMAN |    |   | 24 | 101   | ChromodomainhelicaseDNAbinding protein 1like Homo sapiens                                                    |
| PRC2A_HUMAN |    |   | 24 | 228,9 | Protein PRRC2A <i>Homo sapiens</i>                                                                           |
| U520_HUMAN  |    |   | 24 | 244,5 | U5 small nuclear ribonucleoprotein 200 kDa helicase <i>Homo sapiens</i>                                      |
| RPA1_HUMAN  |    |   | 22 | 194,8 | DNAdirected RNA polymerase I subunit RPA1 Homo sapiens                                                       |
| NAV1_HUMAN  |    |   | 21 | 202,5 | Neuron navigator 1 <i>Homo sapiens</i>                                                                       |
| RPB1_HUMAN  |    |   | 21 | 217,2 | DNAdirected RNA polymerase II subunit RPB1 Homo sapiens                                                      |
| TR150_HUMAN |    |   | 20 | 108,7 | Thyroid hormone receptorassociated protein 3 Homo sapiens                                                    |
| SMHD1_HUMAN |    |   | 20 | 226,4 | Structural maintenance of chromosomes flexible hinge domaincontaining protein 1 Homo sapiens                 |
| XRCC1_HUMAN | 8  |   | 19 | 69,5  | DNA repair protein XRCC1 <i>Homo sapiens</i>                                                                 |
| DPOG1_HUMAN |    |   | 19 | 139,6 | DNA polymerase subunit gamma1 Homo sapiens                                                                   |
| NUFP2_HUMAN |    |   | 19 | 76,1  | Nuclear fragile X mental retardationinteracting protein 2 Homo sapiens                                       |
| NUSAP_HUMAN |    |   | 19 | 49,5  | Nucleolar and spindleassociated protein 1 Homo sapiens                                                       |
| IF16_HUMAN  | 16 |   | 18 | 88,3  | Gammainterferoninducible protein 16 Homo sapiens                                                             |
| CLAP1_HUMAN |    |   | 18 | 169,5 | CLIPassociating protein 1 Homo sapiens                                                                       |
| CLAP2_HUMAN |    |   | 18 | 141,1 | CLIPassociating protein 2 Homo sapiens                                                                       |
| HP1B3_HUMAN |    |   | 18 | 61,2  | Heterochromatin protein 1binding protein 3 Homo sapiens                                                      |
| RFC1_HUMAN  |    |   | 18 | 128,3 | Replication factor C subunit 1 <i>Homo sapiens</i>                                                           |
| RTCB_HUMAN  |    |   | 17 | 55,2  | tRNAsplicing ligase RtcB homolog Homo sapiens                                                                |

|             |    |  |    |       |                                                                                 |
|-------------|----|--|----|-------|---------------------------------------------------------------------------------|
| TOP1_HUMAN  |    |  | 17 | 90,7  | DNA topoisomerase 1 <i>Homo sapiens</i>                                         |
| CE170_HUMAN |    |  | 16 | 175,3 | Centrosomal protein of 170 kDa <i>Homo sapiens</i>                              |
| DPOE1_HUMAN |    |  | 16 | 261,5 | DNA polymerase epsilon catalytic subunit A <i>Homo sapiens</i>                  |
| IMDH2_HUMAN |    |  | 16 | 55,8  | Inosine5' monophosphate dehydrogenase 2 <i>Homo sapiens</i>                     |
| FBX18_HUMAN |    |  | 15 | 117,7 | Fbox only protein 18 <i>Homo sapiens</i>                                        |
| RAD50_HUMAN |    |  | 15 | 153,9 | DNA repair protein RAD50 <i>Homo sapiens</i>                                    |
| YBOX1_HUMAN | 12 |  | 14 | 35,9  | Nucleasesensitive elementbinding protein 1 <i>Homo sapiens</i>                  |
| CHD4_HUMAN  |    |  | 14 | 218   | ChromodomainhelicaseDNAbinding protein 4 <i>Homo sapiens</i>                    |
| CTRO_HUMAN  |    |  | 14 | 231,4 | Citron Rhointeracting kinase <i>Homo sapiens</i>                                |
| DNJC9_HUMAN | 9  |  | 13 | 29,9  | DnaJ homolog subfamily C member 9 <i>Homo sapiens</i>                           |
| PARP9_HUMAN |    |  | 13 | 96,3  | Poly [ADPribose] polymerase 9 <i>Homo sapiens</i>                               |
| RS6_HUMAN   |    |  | 13 | 28,7  | 40S ribosomal protein S6 <i>Homo sapiens</i>                                    |
| SMCA4_HUMAN |    |  | 13 | 184,6 | Transcription activator BRG1 <i>Homo sapiens</i>                                |
| ZCH18_HUMAN |    |  | 13 | 106,4 | Zinc finger CCCH domaincontaining protein 18 <i>Homo sapiens</i>                |
| PNKP_HUMAN  | 6  |  | 12 | 57,1  | Bifunctional polynucleotide phosphatase/kinase <i>Homo sapiens</i>              |
| RBM4_HUMAN  | 6  |  | 12 | 40,3  | RNAbinding protein 4 <i>Homo sapiens</i>                                        |
| DTX3L_HUMAN |    |  | 12 | 83,6  | E3 ubiquitinprotein ligase DTX3L <i>Homo sapiens</i>                            |
| TPX2_HUMAN  |    |  | 12 | 85,7  | Targeting protein for Xklp2 <i>Homo sapiens</i>                                 |
| YLPM1_HUMAN |    |  | 12 | 220   | YLP motifcontaining protein 1 <i>Homo sapiens</i>                               |
| CC037_HUMAN | 16 |  | 11 | 40,6  | UPF0361 protein C3orf37 <i>Homo sapiens</i>                                     |
| TFAM_HUMAN  | 8  |  | 11 | 29,1  | Transcription factor A, mitochondrial <i>Homo sapiens</i>                       |
| ATR_HUMAN   |    |  | 11 | 301,4 | Serine/threonineprotein kinase ATR <i>Homo sapiens</i>                          |
| DLG5_HUMAN  |    |  | 11 | 213,9 | Disks large homolog 5 <i>Homo sapiens</i>                                       |
| RPC1_HUMAN  |    |  | 11 | 155,6 | DNAdirected RNA polymerase III subunit RPC1 <i>Homo sapiens</i>                 |
| TCOF_HUMAN  |    |  | 11 | 152,1 | Treacle protein <i>Homo sapiens</i>                                             |
| ZO2_HUMAN   |    |  | 10 | 134   | Tight junction protein ZO2 <i>Homo sapiens</i>                                  |
| CT072_HUMAN |    |  | 10 | 39,4  | Uncharacterized protein C20orf72 <i>Homo sapiens</i>                            |
| BCLF1_HUMAN |    |  | 10 | 106,1 | Bcl2associated transcription factor 1 <i>Homo sapiens</i>                       |
| FIBB_HUMAN  |    |  | 10 | 55,9  | Fibrinogen beta chain <i>Homo sapiens</i>                                       |
| GEM5_HUMAN  |    |  | 10 | 168,6 | Gemassociated protein 5 <i>Homo sapiens</i>                                     |
| MARK2_HUMAN |    |  | 10 | 87,9  | Serine/threonineprotein kinase MARK2 <i>Homo sapiens</i>                        |
| RPC5_HUMAN  |    |  | 10 | 79,9  | DNAdirected RNA polymerase III subunit RPC5 <i>Homo sapiens</i>                 |
| TCP4_HUMAN  | 10 |  | 9  | 14,4  | Activated RNA polymerase II transcriptional coactivator p15 <i>Homo sapiens</i> |
| ASSY_HUMAN  | 3  |  | 9  | 46,5  | Argininosuccinate synthase <i>Homo sapiens</i>                                  |
| CAMP2_HUMAN |    |  | 9  | 168,1 | Calmodulinregulated spectrinassociated protein 2 <i>Homo sapiens</i>            |
| CARF_HUMAN  |    |  | 9  | 61,1  | CDKN2Ainteracting protein <i>Homo sapiens</i>                                   |
| COPB_HUMAN  |    |  | 9  | 107,1 | Coatomer subunit beta <i>Homo sapiens</i>                                       |
| DHX36_HUMAN |    |  | 9  | 114,8 | Probable ATPdependent RNA helicase DHX36 <i>Homo sapiens</i>                    |
| EMAL3_HUMAN |    |  | 9  | 95,2  | Echinoderm microtubuleassociated proteinlike 3 <i>Homo sapiens</i>              |
| NAV2_HUMAN  |    |  | 9  | 268,2 | Neuron navigator 2 <i>Homo sapiens</i>                                          |
| NCLN_HUMAN  |    |  | 9  | 63    | Nicalin <i>Homo sapiens</i>                                                     |
| NCOA5_HUMAN |    |  | 9  | 65,5  | Nuclear receptor coactivator 5 <i>Homo sapiens</i>                              |
| RPAC1_HUMAN |    |  | 9  | 39,2  | DNAdirected RNA polymerases I and III subunit RPAC1 <i>Homo sapiens</i>         |
| TOP3A_HUMAN |    |  | 9  | 112,4 | DNA topoisomerase 3alpha <i>Homo sapiens</i>                                    |
| WRN_HUMAN   |    |  | 9  | 162,5 | Werner syndrome ATPdependent helicase <i>Homo sapiens</i>                       |
| ZN318_HUMAN |    |  | 9  | 251,1 | Zinc finger protein 318 <i>Homo sapiens</i>                                     |
| F262_HUMAN  | 10 |  | 8  | 58,5  | 6phosphofructo2kinase/fructose2,6bisphosphatase 2 <i>Homo sapiens</i>           |
| SEPT2_HUMAN | 5  |  | 8  | 41,5  | Septin2 <i>Homo sapiens</i>                                                     |
| MRE11_HUMAN |    |  | 8  | 80,6  | Doublestrand break repair protein MRE11A <i>Homo sapiens</i>                    |

|             |   |  |   |       |                                                                                         |
|-------------|---|--|---|-------|-----------------------------------------------------------------------------------------|
| LARP1_HUMAN |   |  | 8 | 123,5 | Larelated protein 1 Homo sapiens                                                        |
| CAPR1_HUMAN |   |  | 8 | 78,4  | Caprin1 Homo sapiens                                                                    |
| COPG_HUMAN  |   |  | 8 | 97,7  | Coatomer subunit gamma <i>Homo sapiens</i>                                              |
| ABCF2_HUMAN |   |  | 8 | 71,3  | ATPbinding cassette subfamily F member 2 Homo sapiens                                   |
| ASCC2_HUMAN |   |  | 8 | 86,4  | Activating signal cointegrator 1 complex subunit 2 <i>Homo sapiens</i>                  |
| AXIN1_HUMAN |   |  | 8 | 95,6  | Axin1 Homo sapiens                                                                      |
| CND1_HUMAN  |   |  | 8 | 157,2 | Condensin complex subunit 1 <i>Homo sapiens</i>                                         |
| DHAK_HUMAN  |   |  | 8 | 58,9  | Bifunctional ATPdependent dihydroxyacetone kinase/FADAMP lyase (cyclizing) Homo sapiens |
| LEMD2_HUMAN |   |  | 8 | 57    | LEM domaincontaining protein 2 Homo sapiens                                             |
| LETM1_HUMAN |   |  | 8 | 83,4  | LETM1 and EFhand domaincontaining protein 1, mitochondrial Homo sapiens                 |
| PI51A_HUMAN |   |  | 8 | 62,6  | Phosphatidylinositol4phosphate 5kinase type1 alpha Homo sapiens                         |
| RIF1_HUMAN  |   |  | 8 | 274,5 | Telomereassociated protein RIF1 Homo sapiens                                            |
| RL24_HUMAN  |   |  | 8 | 17,8  | 60S ribosomal protein L24 <i>Homo sapiens</i>                                           |
| TIM44_HUMAN |   |  | 8 | 51,4  | Mitochondrial import inner membrane translocase subunit TIM44 <i>Homo sapiens</i>       |
| TRAF4_HUMAN |   |  | 8 | 53,5  | TNF receptorassociated factor 4 Homo sapiens                                            |
| DBPA_HUMAN  | 9 |  | 7 | 40,1  | DNAbinding protein A Homo sapiens                                                       |
| 3MG_HUMAN   | 8 |  | 7 | 32,9  | DNA3methyladenine glycosylase Homo sapiens                                              |
| RFA2_HUMAN  | 6 |  | 7 | 29,2  | Replication protein A 32 kDa subunit <i>Homo sapiens</i>                                |
| GSK3A_HUMAN | 5 |  | 7 | 51    | Glycogen synthase kinase3 alpha Homo sapiens                                            |
| SRSF3_HUMAN | 4 |  | 7 | 19,3  | Serine/arginerich splicing factor 3 Homo sapiens                                        |
| HXK2_HUMAN  | 3 |  | 7 | 102,4 | Hexokinase2 Homo sapiens                                                                |
| DYHC1_HUMAN |   |  | 7 | 532,4 | Cytoplasmic dynein 1 heavy chain 1 <i>Homo sapiens</i>                                  |
| H31T_HUMAN  |   |  | 7 | 15,5  | Histone H3.1t <i>Homo sapiens</i>                                                       |
| ASPH_HUMAN  |   |  | 7 | 85,9  | Aspartyl/asparaginyl betahydroxylase Homo sapiens                                       |
| AZI1_HUMAN  |   |  | 7 | 122,1 | 5azacytidineinduced protein 1 Homo sapiens                                              |
| CAMP3_HUMAN |   |  | 7 | 134,8 | Calmodulinregulated spectrinassociated protein 3 Homo sapiens                           |
| CN043_HUMAN |   |  | 7 | 115   | Uncharacterized protein C14orf43 <i>Homo sapiens</i>                                    |
| CN37_HUMAN  |   |  | 7 | 47,6  | 2',3'cyclicnucleotide 3'phosphodiesterase Homo sapiens                                  |
| COPD_HUMAN  |   |  | 7 | 57,2  | Coatomer subunit delta <i>Homo sapiens</i>                                              |
| HDAC1_HUMAN |   |  | 7 | 55,1  | Histone deacetylase 1 <i>Homo sapiens</i>                                               |
| IMDH1_HUMAN |   |  | 7 | 55,4  | Inosine5' monophosphate dehydrogenase 1 Homo sapiens                                    |
| KIF23_HUMAN |   |  | 7 | 110,1 | Kinesinlike protein KIF23 Homo sapiens                                                  |
| NOP14_HUMAN |   |  | 7 | 97,7  | Nucleolar protein 14 <i>Homo sapiens</i>                                                |
| PRP8_HUMAN  |   |  | 7 | 273,6 | PremRNAprocessingsplicing factor 8 Homo sapiens                                         |
| RBM27_HUMAN |   |  | 7 | 118,7 | RNAbinding protein 27 Homo sapiens                                                      |
| RRBP1_HUMAN |   |  | 7 | 152,5 | Ribosomebinding protein 1 Homo sapiens                                                  |
| SEC63_HUMAN |   |  | 7 | 88    | Translocation protein SEC63 homolog <i>Homo sapiens</i>                                 |
| SYSC_HUMAN  |   |  | 7 | 58,8  | SerinetRNA ligase, cytoplasmic Homo sapiens                                             |
| TIM_HUMAN   |   |  | 7 | 138,7 | Protein timeless homolog <i>Homo sapiens</i>                                            |
| TREX1_HUMAN |   |  | 7 | 38,9  | Three prime repair exonuclease 1 <i>Homo sapiens</i>                                    |
| VAPA_HUMAN  |   |  | 7 | 27,9  | Vesicleassociated membrane proteinassociated protein A Homo sapiens                     |
| RBM22_HUMAN | 7 |  | 6 | 46,9  | PremRNAsplicing factor RBM22 Homo sapiens                                               |
| NIBL1_HUMAN | 6 |  | 6 | 84,1  | Nibanlike protein 1 Homo sapiens                                                        |
| KIF1C_HUMAN | 3 |  | 6 | 122,9 | Kinesinlike protein KIF1C Homo sapiens                                                  |
| UN45A_HUMAN | 3 |  | 6 | 103,1 | Protein unc45 homolog A Homo sapiens                                                    |
| SLTM_HUMAN  |   |  | 6 | 117,1 | SAFBlike transcription modulator Homo sapiens                                           |
| DDB2_HUMAN  |   |  | 6 | 47,9  | DNA damagebinding protein 2 Homo sapiens                                                |

|             |    |  |   |       |                                                                                                      |
|-------------|----|--|---|-------|------------------------------------------------------------------------------------------------------|
| H33_HUMAN   |    |  | 6 | 15,3  | Histone H3.3 <i>Homo sapiens</i>                                                                     |
| 2AAA_HUMAN  |    |  | 6 | 65,3  | Serine/threonineprotein phosphatase 2A 65 kDa regulatory subunit A alpha isoform <i>Homo sapiens</i> |
| ACAD9_HUMAN |    |  | 6 | 68,8  | AcylCoA dehydrogenase family member 9, mitochondrial <i>Homo sapiens</i>                             |
| ACADM_HUMAN |    |  | 6 | 46,6  | Mediumchain specific acylCoA dehydrogenase, mitochondrial <i>Homo sapiens</i>                        |
| ACD11_HUMAN |    |  | 6 | 87,3  | AcylCoA dehydrogenase family member 11 <i>Homo sapiens</i>                                           |
| ADNP_HUMAN  |    |  | 6 | 123,6 | Activitydependent neuroprotector homeobox protein <i>Homo sapiens</i>                                |
| AMPD2_HUMAN |    |  | 6 | 100,7 | AMP deaminase 2 <i>Homo sapiens</i>                                                                  |
| CATA_HUMAN  |    |  | 6 | 59,8  | Catalase <i>Homo sapiens</i>                                                                         |
| IMA1_HUMAN  |    |  | 6 | 60,2  | Importin subunit alpha1 <i>Homo sapiens</i>                                                          |
| KHDR1_HUMAN |    |  | 6 | 48,2  | KH domaincontaining, RNAbinding, signal transductionassociated protein 1 <i>Homo sapiens</i>         |
| PACN2_HUMAN |    |  | 6 | 55,7  | Protein kinase C and casein kinase substrate in neurons protein 2 <i>Homo sapiens</i>                |
| PHLB2_HUMAN |    |  | 6 | 142,2 | Pleckstrin homologylike domain family B member 2 <i>Homo sapiens</i>                                 |
| RBBP6_HUMAN |    |  | 6 | 201,6 | E3 ubiquitinprotein ligase RBBP6 <i>Homo sapiens</i>                                                 |
| RBM15_HUMAN |    |  | 6 | 107,2 | Putative RNAbinding protein 15 <i>Homo sapiens</i>                                                   |
| RL17_HUMAN  |    |  | 6 | 21,4  | 60S ribosomal protein L17 <i>Homo sapiens</i>                                                        |
| RPAB1_HUMAN |    |  | 6 | 24,6  | DNAdirected RNA polymerases I, II, and III subunit RPABC1 <i>Homo sapiens</i>                        |
| RPB2_HUMAN  |    |  | 6 | 133,9 | DNAdirected RNA polymerase II subunit RPB2 <i>Homo sapiens</i>                                       |
| RS19_HUMAN  |    |  | 6 | 16,1  | 40S ribosomal protein S19 <i>Homo sapiens</i>                                                        |
| SAC1_HUMAN  |    |  | 6 | 67    | Phosphatidylinositide phosphatase SAC1 <i>Homo sapiens</i>                                           |
| SAFB2_HUMAN |    |  | 6 | 107,5 | Scaffold attachment factor B2 <i>Homo sapiens</i>                                                    |
| SERC_HUMAN  |    |  | 6 | 40,4  | Phosphoserine aminotransferase <i>Homo sapiens</i>                                                   |
| TP53B_HUMAN |    |  | 6 | 213,6 | Tumor suppressor p53binding protein 1 <i>Homo sapiens</i>                                            |
| TRI25_HUMAN |    |  | 6 | 71    | E3 ubiquitin/ISG15 ligase TRIM25 <i>Homo sapiens</i>                                                 |
| WDR1_HUMAN  |    |  | 6 | 66,2  | WD repeatcontaining protein 1 <i>Homo sapiens</i>                                                    |
| ZNFX1_HUMAN |    |  | 6 | 220,2 | NFX1type zinc fingercontaining protein 1 <i>Homo sapiens</i>                                         |
| GSK3B_HUMAN | 13 |  | 5 | 46,7  | Glycogen synthase kinase3 beta <i>Homo sapiens</i>                                                   |
| DPOLB_HUMAN | 7  |  | 5 | 38,2  | DNA polymerase beta <i>Homo sapiens</i>                                                              |
| HMMR_HUMAN  | 6  |  | 5 | 84,1  | Hyaluronan mediated motility receptor <i>Homo sapiens</i>                                            |
| RBM26_HUMAN | 4  |  | 5 | 113,6 | RNAbinding protein 26 <i>Homo sapiens</i>                                                            |
| U2AF1_HUMAN | 3  |  | 5 | 27,9  | Splicing factor U2AF 35 kDa subunit <i>Homo sapiens</i>                                              |
| CTR9_HUMAN  |    |  | 5 | 133,5 | RNA polymeraseassociated protein CTR9 homolog <i>Homo sapiens</i>                                    |
| AURKA_HUMAN |    |  | 5 | 45,8  | Aurora kinase A <i>Homo sapiens</i>                                                                  |
| RNZ2_HUMAN  |    |  | 5 | 92,2  | Zinc phosphodiesterase ELAC protein 2 <i>Homo sapiens</i>                                            |
| ANM1_HUMAN  |    |  | 5 | 41,5  | Protein arginine Nmethyltransferase 1 <i>Homo sapiens</i>                                            |
| AP1G1_HUMAN |    |  | 5 | 91,4  | AP1 complex subunit gamma1 <i>Homo sapiens</i>                                                       |
| AQR_HUMAN   |    |  | 5 | 171,3 | Intronbinding protein aquarius <i>Homo sapiens</i>                                                   |
| DNJA2_HUMAN |    |  | 5 | 45,7  | DnaJ homolog subfamily A member 2 <i>Homo sapiens</i>                                                |
| DOCK7_HUMAN |    |  | 5 | 242,6 | Dedicator of cytokinesis protein 7 <i>Homo sapiens</i>                                               |
| DPM1_HUMAN  |    |  | 5 | 29,6  | Dolicholphosphate mannosyltransferase <i>Homo sapiens</i>                                            |
| ESYT2_HUMAN |    |  | 5 | 102,4 | Extended synaptotagmin2 <i>Homo sapiens</i>                                                          |
| FA98A_HUMAN |    |  | 5 | 55,4  | Protein FAM98A <i>Homo sapiens</i>                                                                   |
| FXR1_HUMAN  |    |  | 5 | 69,7  | Fragile X mental retardation syndromerelated protein 1 <i>Homo sapiens</i>                           |
| G3BP1_HUMAN |    |  | 5 | 52,2  | Ras GTPaseactivating proteinbinding protein 1 <i>Homo sapiens</i>                                    |
| H1X_HUMAN   |    |  | 5 | 22,5  | Histone H1x <i>Homo sapiens</i>                                                                      |
| HDAC2_HUMAN |    |  | 5 | 55,4  | Histone deacetylase 2 <i>Homo sapiens</i>                                                            |
| IMA7_HUMAN  |    |  | 5 | 60    | Importin subunit alpha7 <i>Homo sapiens</i>                                                          |

|              |    |  |   |       |                                                                              |
|--------------|----|--|---|-------|------------------------------------------------------------------------------|
| KCAB2_HUMAN  |    |  | 5 | 41    | Voltagegated potassium channel subunit beta2 Homo sapiens                    |
| LYRIC_HUMAN  |    |  | 5 | 63,8  | Protein LYRIC <i>Homo sapiens</i>                                            |
| MARK3_HUMAN  |    |  | 5 | 84,5  | MAP/microtubule affinityregulating kinase 3 Homo sapiens                     |
| MCM6_HUMAN   |    |  | 5 | 92,9  | DNA replication licensing factor MCM6 <i>Homo sapiens</i>                    |
| MLH1_HUMAN   |    |  | 5 | 84,6  | DNA mismatch repair protein Mlh1 <i>Homo sapiens</i>                         |
| NOP58_HUMAN  |    |  | 5 | 59,6  | Nucleolar protein 58 <i>Homo sapiens</i>                                     |
| NU153_HUMAN  |    |  | 5 | 153,9 | Nuclear pore complex protein Nup153 <i>Homo sapiens</i>                      |
| NUDT9_HUMAN  |    |  | 5 | 39,1  | ADPribose pyrophosphatase, mitochondrial Homo sapiens                        |
| PAK2_HUMAN   |    |  | 5 | 58    | Serine/threonineprotein kinase PAK 2 Homo sapiens                            |
| PARP2_HUMAN  |    |  | 5 | 66,2  | Poly [ADPribose] polymerase 2 Homo sapiens                                   |
| POGZ_HUMAN   |    |  | 5 | 155,3 | Pogo transposable element with ZNF domain <i>Homo sapiens</i>                |
| PSMD3_HUMAN  |    |  | 5 | 61    | 26S proteasome nonATPase regulatory subunit 3 Homo sapiens                   |
| REPI1_HUMAN  |    |  | 5 | 63,6  | Replication initiator 1 <i>Homo sapiens</i>                                  |
| RPAB3_HUMAN  |    |  | 5 | 17,1  | DNAdirected RNA polymerases I, II, and III subunit RPABC3 Homo sapiens       |
| RPC4_HUMAN   |    |  | 5 | 44,4  | DNAdirected RNA polymerase III subunit RPC4 Homo sapiens                     |
| RPC6_HUMAN   |    |  | 5 | 35,7  | DNAdirected RNA polymerase III subunit RPC6 Homo sapiens                     |
| SMRC1_HUMAN  |    |  | 5 | 122,9 | SWI/SNF complex subunit SMARCC1 <i>Homo sapiens</i>                          |
| SYIC_HUMAN   |    |  | 5 | 144,5 | IsoleucinetRNA ligase, cytoplasmic Homo sapiens                              |
| TSR1_HUMAN   |    |  | 5 | 91,8  | PrerRNAprocessing protein TSR1 homolog Homo sapiens                          |
| UFL1_HUMAN   |    |  | 5 | 89,6  | E3 UFM1protein ligase 1 Homo sapiens                                         |
| ZN598_HUMAN  |    |  | 5 | 98,6  | Zinc finger protein 598 <i>Homo sapiens</i>                                  |
| FO XK1_HUMAN | 10 |  | 4 | 75,5  | Forkhead box protein K1 <i>Homo sapiens</i>                                  |
| STA5B_HUMAN  | 9  |  | 4 | 89,9  | Signal transducer and activator of transcription 5B <i>Homo sapiens</i>      |
| NC2A_HUMAN   | 8  |  | 4 | 22,3  | Dr1associated corepressor Homo sapiens                                       |
| ZCCHV_HUMAN  | 8  |  | 4 | 101,4 | Zinc finger CCCHtype antiviral protein 1 Homo sapiens                        |
| PURB_HUMAN   | 5  |  | 4 | 33,2  | Transcriptional activator protein Purbeta Homo sapiens                       |
| REEP5_HUMAN  | 3  |  | 4 | 21,5  | Receptor expressionenhancing protein 5 Homo sapiens                          |
| UBP7_HUMAN   |    |  | 4 | 128,3 | Ubiquitin carboxylterminal hydrolase 7 Homo sapiens                          |
| DBR1_HUMAN   |    |  | 4 | 61,6  | Lariat debranching enzyme <i>Homo sapiens</i>                                |
| PTGR1_HUMAN  |    |  | 4 | 35,9  | Prostaglandin reductase 1 <i>Homo sapiens</i>                                |
| RBM39_HUMAN  |    |  | 4 | 59,4  | RNAbinding protein 39 Homo sapiens                                           |
| YTHD2_HUMAN  |    |  | 4 | 62,3  | YTH domain family protein 2 <i>Homo sapiens</i>                              |
| 1C12_HUMAN   |    |  | 4 | 40,9  | HLA class I histocompatibility antigen, Cw12 alpha chain Homo sapiens        |
| ACOX1_HUMAN  |    |  | 4 | 74,4  | Peroxisomal acylcoenzyme A oxidase 1 Homo sapiens                            |
| RFC3_HUMAN   |    |  | 4 | 40,6  | Replication factor C subunit 3 <i>Homo sapiens</i>                           |
| SYFA_HUMAN   |    |  | 4 | 57,6  | PhenylalaninetRNA ligase alpha subunit Homo sapiens                          |
| TECR_HUMAN   |    |  | 4 | 36    | Trans2,3enoylCoA reductase Homo sapiens                                      |
| AATC_HUMAN   |    |  | 4 | 46,2  | Aspartate aminotransferase, cytoplasmic <i>Homo sapiens</i>                  |
| ACL6A_HUMAN  |    |  | 4 | 47,5  | Actinlike protein 6A Homo sapiens                                            |
| ASCC1_HUMAN  |    |  | 4 | 45,5  | Activating signal cointegrator 1 complex subunit 1 <i>Homo sapiens</i>       |
| ASH2L_HUMAN  |    |  | 4 | 68,7  | Set1/Ash2 histone methyltransferase complex subunit ASH2 <i>Homo sapiens</i> |
| AT5F1_HUMAN  |    |  | 4 | 28,9  | ATP synthase subunit b, mitochondrial <i>Homo sapiens</i>                    |
| CC165_HUMAN  |    |  | 4 | 208,7 | Coiledcoil domaincontaining protein 165 Homo sapiens                         |
| CCD47_HUMAN  |    |  | 4 | 55,9  | Coiledcoil domaincontaining protein 47 Homo sapiens                          |
| CGL_HUMAN    |    |  | 4 | 44,5  | Cystathionine gammalyase Homo sapiens                                        |
| CHTOP_HUMAN  |    |  | 4 | 26,4  | Chromatin target of PRMT1 protein <i>Homo sapiens</i>                        |
| CISY_HUMAN   |    |  | 4 | 51,7  | Citrate synthase, mitochondrial <i>Homo sapiens</i>                          |
| DIC_HUMAN    |    |  | 4 | 31,3  | Mitochondrial dicarboxylate carrier <i>Homo sapiens</i>                      |

|             |  |  |   |       |                                                                                                         |
|-------------|--|--|---|-------|---------------------------------------------------------------------------------------------------------|
| DPOG2_HUMAN |  |  | 4 | 54,9  | DNA polymerase subunit gamma2, mitochondrial Homo sapiens                                               |
| ECI2_HUMAN  |  |  | 4 | 43,6  | EnoylCoA delta isomerase 2, mitochondrial Homo sapiens                                                  |
| ELYS_HUMAN  |  |  | 4 | 252,5 | Protein ELYS <i>Homo sapiens</i>                                                                        |
| EMD_HUMAN   |  |  | 4 | 29    | Emerin <i>Homo sapiens</i>                                                                              |
| G3BP2_HUMAN |  |  | 4 | 54,1  | Ras GTPaseactivating proteinbinding protein 2 Homo sapiens                                              |
| HNRL1_HUMAN |  |  | 4 | 60,1  | Heterogeneous nuclear ribonucleoprotein Llike Homo sapiens                                              |
| IGHG1_HUMAN |  |  | 4 | 36,1  | Ig gamma1 chain C region Homo sapiens                                                                   |
| KIF22_HUMAN |  |  | 4 | 73,3  | Kinesinlike protein KIF22 Homo sapiens                                                                  |
| LIPB1_HUMAN |  |  | 4 | 114   | Liprinbeta1 Homo sapiens                                                                                |
| LIS1_HUMAN  |  |  | 4 | 46,6  | Plateletactivating factor acetylhydrolase IB subunit alpha Homo sapiens                                 |
| NMT1_HUMAN  |  |  | 4 | 56,8  | Glycylpeptide Ntetradecanoyltransferase 1 Homo sapiens                                                  |
| NOG1_HUMAN  |  |  | 4 | 74    | Nucleolar GTPbinding protein 1 Homo sapiens                                                             |
| NU205_HUMAN |  |  | 4 | 227,9 | Nuclear pore complex protein Nup205 <i>Homo sapiens</i>                                                 |
| P121A_HUMAN |  |  | 4 | 127,7 | Nuclear envelope pore membrane protein POM 121 <i>Homo sapiens</i>                                      |
| P121C_HUMAN |  |  | 4 | 125,1 | Nuclear envelope pore membrane protein POM 121C <i>Homo sapiens</i>                                     |
| PCF11_HUMAN |  |  | 4 | 173,1 | PremRNA cleavage complex 2 protein Pcf11 Homo sapiens                                                   |
| PKP4_HUMAN  |  |  | 4 | 131,9 | Plakophilin4 Homo sapiens                                                                               |
| PLK1_HUMAN  |  |  | 4 | 68,3  | Serine/threonineprotein kinase PLK1 Homo sapiens                                                        |
| PRPS1_HUMAN |  |  | 4 | 34,8  | Ribosephosphate pyrophosphokinase 1 Homo sapiens                                                        |
| PRS7_HUMAN  |  |  | 4 | 48,6  | 26S protease regulatory subunit 7 <i>Homo sapiens</i>                                                   |
| PSPC1_HUMAN |  |  | 4 | 58,7  | Paraspeckle component 1 <i>Homo sapiens</i>                                                             |
| PURA2_HUMAN |  |  | 4 | 50,1  | Adenylosuccinate synthetase isozyme 2 <i>Homo sapiens</i>                                               |
| RB12B_HUMAN |  |  | 4 | 118,1 | RNAbinding protein 12B Homo sapiens                                                                     |
| RBM6_HUMAN  |  |  | 4 | 128,6 | RNAbinding protein 6 Homo sapiens                                                                       |
| RED_HUMAN   |  |  | 4 | 65,6  | Protein Red <i>Homo sapiens</i>                                                                         |
| RFC2_HUMAN  |  |  | 4 | 39,2  | Replication factor C subunit 2 <i>Homo sapiens</i>                                                      |
| RFC5_HUMAN  |  |  | 4 | 38,5  | Replication factor C subunit 5 <i>Homo sapiens</i>                                                      |
| RL19_HUMAN  |  |  | 4 | 23,5  | 60S ribosomal protein L19 <i>Homo sapiens</i>                                                           |
| RL26_HUMAN  |  |  | 4 | 17,3  | 60S ribosomal protein L26 <i>Homo sapiens</i>                                                           |
| RL5_HUMAN   |  |  | 4 | 34,4  | 60S ribosomal protein L5 <i>Homo sapiens</i>                                                            |
| RPC3_HUMAN  |  |  | 4 | 60,6  | DNAdirected RNA polymerase III subunit RPC3 Homo sapiens                                                |
| RS16_HUMAN  |  |  | 4 | 16,4  | 40S ribosomal protein S16 <i>Homo sapiens</i>                                                           |
| SAFB1_HUMAN |  |  | 4 | 102,6 | Scaffold attachment factor B1 <i>Homo sapiens</i>                                                       |
| SAHH2_HUMAN |  |  | 4 | 59    | Putative adenylosuccinylhomocysteinase 2 <i>Homo sapiens</i>                                            |
| SMCA2_HUMAN |  |  | 4 | 181,3 | Probable global transcription activator SNF2L2 <i>Homo sapiens</i>                                      |
| SMCE1_HUMAN |  |  | 4 | 46,6  | SWI/SNFrelated matrixassociated actindependent regulator of chromatin subfamily E member 1 Homo sapiens |
| SMRC2_HUMAN |  |  | 4 | 132,9 | SWI/SNF complex subunit SMARCC2 <i>Homo sapiens</i>                                                     |
| SPAS2_HUMAN |  |  | 4 | 59,5  | Spermatogenesisassociated serinerich protein 2 Homo sapiens                                             |
| SPSY_HUMAN  |  |  | 4 | 41,3  | Spermine synthase <i>Homo sapiens</i>                                                                   |
| SYMC_HUMAN  |  |  | 4 | 101,1 | MethioninetRNA ligase, cytoplasmic Homo sapiens                                                         |
| TBX3_HUMAN  |  |  | 4 | 79,4  | Tbox transcription factor TBX3 Homo sapiens                                                             |
| THIM_HUMAN  |  |  | 4 | 41,9  | 3ketoacylCoA thiolase, mitochondrial Homo sapiens                                                       |
| TOIP1_HUMAN |  |  | 4 | 66,2  | Torsin1Ainteracting protein 1 Homo sapiens                                                              |
| TRI33_HUMAN |  |  | 4 | 122,5 | E3 ubiquitinprotein ligase TRIM33 Homo sapiens                                                          |
| TRIP4_HUMAN |  |  | 4 | 66,1  | Activating signal cointegrator 1 <i>Homo sapiens</i>                                                    |
| TTC37_HUMAN |  |  | 4 | 175,5 | Tetratricopeptide repeat protein 37 <i>Homo sapiens</i>                                                 |
| UBP10_HUMAN |  |  | 4 | 87,1  | Ubiquitin carboxylterminal hydrolase 10 Homo sapiens                                                    |
| UBP47_HUMAN |  |  | 4 | 157,3 | Ubiquitin carboxylterminal hydrolase 47 Homo sapiens                                                    |

|             |   |  |   |       |                                                                          |
|-------------|---|--|---|-------|--------------------------------------------------------------------------|
| UGDH_HUMAN  |   |  | 4 | 55    | UDPglucose 6dehydrogenase Homo sapiens                                   |
| UMPS_HUMAN  |   |  | 4 | 52,2  | Uridine 5'monophosphate synthase Homo sapiens                            |
| VRK2_HUMAN  |   |  | 4 | 58,1  | Serine/threonineprotein kinase VRK2 Homo sapiens                         |
| RTF1_HUMAN  | 9 |  | 3 | 80,3  | RNA polymeraseassociated protein RTF1 homolog Homo sapiens               |
| SSBP_HUMAN  | 7 |  | 3 | 17,3  | Singlestranded DNAbinding protein, mitochondrial Homo sapiens            |
| ROA0_HUMAN  | 6 |  | 3 | 30,8  | Heterogeneous nuclear ribonucleoprotein A0 <i>Homo sapiens</i>           |
| FA98B_HUMAN | 5 |  | 3 | 37,2  | Protein FAM98B <i>Homo sapiens</i>                                       |
| UHRF2_HUMAN | 5 |  | 3 | 90    | E3 ubiquitinprotein ligase UHRF2 Homo sapiens                            |
| HNRPC_HUMAN | 4 |  | 3 | 33,7  | Heterogeneous nuclear ribonucleoproteins C1/C2 <i>Homo sapiens</i>       |
| LS14A_HUMAN | 4 |  | 3 | 50,5  | Protein LSM14 homolog A <i>Homo sapiens</i>                              |
| UBCP1_HUMAN | 4 |  | 3 | 36,8  | Ubiquitinlike domaincontaining CTD phosphatase 1 Homo sapiens            |
| ZFP91_HUMAN | 3 |  | 3 | 63,4  | E3 ubiquitinprotein ligase ZFP91 Homo sapiens                            |
| APTX_HUMAN  | 3 |  | 3 | 40,7  | Aprataxin <i>Homo sapiens</i>                                            |
| NOSIP_HUMAN | 3 |  | 3 | 33,2  | Nitric oxide synthaseinteracting protein Homo sapiens                    |
| QCR2_HUMAN  | 3 |  | 3 | 48,4  | Cytochrome bc1 complex subunit 2, mitochondrial Homo sapiens             |
| T2EB_HUMAN  | 3 |  | 3 | 33    | Transcription initiation factor IIE subunit beta <i>Homo sapiens</i>     |
| GLO2_HUMAN  |   |  | 3 | 33,8  | Hydroxyacylglutathione hydrolase, mitochondrial <i>Homo sapiens</i>      |
| CU059_HUMAN |   |  | 3 | 33,2  | Uncharacterized protein C21orf59 <i>Homo sapiens</i>                     |
| DKC1_HUMAN  |   |  | 3 | 57,7  | H/ACA ribonucleoprotein complex subunit 4 <i>Homo sapiens</i>            |
| SEPT6_HUMAN |   |  | 3 | 49,7  | Septin6 Homo sapiens                                                     |
| CAZA2_HUMAN |   |  | 3 | 32,9  | Factincapping protein subunit alpha2 Homo sapiens                        |
| CDK4_HUMAN  |   |  | 3 | 33,7  | Cyclindependent kinase 4 Homo sapiens                                    |
| KC1A_HUMAN  |   |  | 3 | 38,9  | Casein kinase I isoform alpha <i>Homo sapiens</i>                        |
| PHB2_HUMAN  |   |  | 3 | 33,3  | Prohibitin2 Homo sapiens                                                 |
| UB2L3_HUMAN |   |  | 3 | 17,9  | Ubiquitinconjugating enzyme E2 L3 Homo sapiens                           |
| AAAS_HUMAN  |   |  | 3 | 59,6  | Aladin <i>Homo sapiens</i>                                               |
| ABCD3_HUMAN |   |  | 3 | 75,5  | ATPbinding cassette subfamily D member 3 Homo sapiens                    |
| ACD_HUMAN   |   |  | 3 | 57,7  | Adrenocortical dysplasia protein homolog <i>Homo sapiens</i>             |
| ACOT1_HUMAN |   |  | 3 | 46,3  | Acylcoenzyme A thioesterase 1 Homo sapiens                               |
| ARHG2_HUMAN |   |  | 3 | 111,5 | Rho guanine nucleotide exchange factor 2 <i>Homo sapiens</i>             |
| ASNS_HUMAN  |   |  | 3 | 64,4  | Asparagine synthetase [glutaminehydrolyzing] Homo sapiens                |
| AUP1_HUMAN  |   |  | 3 | 53    | Ancient ubiquitous protein 1 <i>Homo sapiens</i>                         |
| CELF1_HUMAN |   |  | 3 | 52,1  | CUGBP Elavlike family member 1 Homo sapiens                              |
| CHD3_HUMAN  |   |  | 3 | 226,6 | ChromodomainhelicaseDNAbinding protein 3 Homo sapiens                    |
| CHIP_HUMAN  |   |  | 3 | 34,9  | E3 ubiquitinprotein ligase CHIP Homo sapiens                             |
| CKAP2_HUMAN |   |  | 3 | 77    | Cytoskeletonassociated protein 2 Homo sapiens                            |
| CLPB_HUMAN  |   |  | 3 | 78,7  | Caseinolytic peptidase B protein homolog <i>Homo sapiens</i>             |
| CLUS_HUMAN  |   |  | 3 | 52,5  | Clusterin <i>Homo sapiens</i>                                            |
| CND2_HUMAN  |   |  | 3 | 82,6  | Condensin complex subunit 2 <i>Homo sapiens</i>                          |
| CNOT1_HUMAN |   |  | 3 | 266,9 | CCR4NOT transcription complex subunit 1 Homo sapiens                     |
| CS010_HUMAN |   |  | 3 | 18,8  | UPF0556 protein C19orf10 <i>Homo sapiens</i>                             |
| CSN3_HUMAN  |   |  | 3 | 47,9  | COP9 signalosome complex subunit 3 <i>Homo sapiens</i>                   |
| CSPG4_HUMAN |   |  | 3 | 250,5 | Chondroitin sulfate proteoglycan 4 <i>Homo sapiens</i>                   |
| CUL1_HUMAN  |   |  | 3 | 89,7  | Cullin1 Homo sapiens                                                     |
| CXXC1_HUMAN |   |  | 3 | 75,7  | CpGbinding protein Homo sapiens                                          |
| ECHB_HUMAN  |   |  | 3 | 51,3  | Trifunctional enzyme subunit beta, mitochondrial <i>Homo sapiens</i>     |
| EI2BB_HUMAN |   |  | 3 | 39    | Translation initiation factor eIF2B subunit beta Homo sapiens            |
| EIF2A_HUMAN |   |  | 3 | 65    | Eukaryotic translation initiation factor 2A <i>Homo sapiens</i>          |
| EIF3E_HUMAN |   |  | 3 | 52,2  | Eukaryotic translation initiation factor 3 subunit E <i>Homo sapiens</i> |



|             |  |  |   |       |                                                                                                        |
|-------------|--|--|---|-------|--------------------------------------------------------------------------------------------------------|
| EIF3L_HUMAN |  |  | 3 | 66,7  | Eukaryotic translation initiation factor 3 subunit L <i>Homo sapiens</i>                               |
| ERCC5_HUMAN |  |  | 3 | 133,1 | DNA repair protein complementing XPG cells <i>Homo sapiens</i>                                         |
| ERG7_HUMAN  |  |  | 3 | 83,3  | Lanosterol synthase <i>Homo sapiens</i>                                                                |
| EST1A_HUMAN |  |  | 3 | 160,5 | Telomerasebinding protein EST1A <i>Homo sapiens</i>                                                    |
| ESTD_HUMAN  |  |  | 3 | 31,5  | Sformylglutathione hydrolase <i>Homo sapiens</i>                                                       |
| F164A_HUMAN |  |  | 3 | 35,1  | Protein FAM164A <i>Homo sapiens</i>                                                                    |
| FAF2_HUMAN  |  |  | 3 | 52,6  | FASassociated factor 2 <i>Homo sapiens</i>                                                             |
| FIBG_HUMAN  |  |  | 3 | 51,5  | Fibrinogen gamma chain <i>Homo sapiens</i>                                                             |
| FKBP5_HUMAN |  |  | 3 | 51,2  | Peptidylprolyl cistrans isomerase FKBP5 <i>Homo sapiens</i>                                            |
| HYEP_HUMAN  |  |  | 3 | 52,9  | Epoxide hydrolase 1 <i>Homo sapiens</i>                                                                |
| IF2B3_HUMAN |  |  | 3 | 63,7  | Insulinlike growth factor 2 mRNAbinding protein 3 <i>Homo sapiens</i>                                  |
| IGHG3_HUMAN |  |  | 3 | 41,3  | Ig gamma3 chain C region <i>Homo sapiens</i>                                                           |
| ILK_HUMAN   |  |  | 3 | 51,4  | Integrinlinked protein kinase <i>Homo sapiens</i>                                                      |
| INF2_HUMAN  |  |  | 3 | 135,6 | Inverted formin2 <i>Homo sapiens</i>                                                                   |
| ITB1_HUMAN  |  |  | 3 | 88,4  | Integrin beta1 <i>Homo sapiens</i>                                                                     |
| IVD_HUMAN   |  |  | 3 | 46,3  | IsovalerylCoA dehydrogenase, mitochondrial <i>Homo sapiens</i>                                         |
| KCY_HUMAN   |  |  | 3 | 22,2  | UMPCMP kinase <i>Homo sapiens</i>                                                                      |
| KIF2C_HUMAN |  |  | 3 | 81,3  | Kinesinlike protein KIF2C <i>Homo sapiens</i>                                                          |
| LACB2_HUMAN |  |  | 3 | 32,8  | Betalactamase like protein 2 <i>Homo sapiens</i>                                                       |
| LIPA1_HUMAN |  |  | 3 | 135,8 | Liprin alpha1 <i>Homo sapiens</i>                                                                      |
| LMAN2_HUMAN |  |  | 3 | 40,2  | Vesicular integral membrane protein VIP36 <i>Homo sapiens</i>                                          |
| LRC41_HUMAN |  |  | 3 | 88,6  | Leucinerich repeatcontaining protein 41 <i>Homo sapiens</i>                                            |
| LUZP1_HUMAN |  |  | 3 | 120,3 | Leucine zipper protein 1 <i>Homo sapiens</i>                                                           |
| M2OM_HUMAN  |  |  | 3 | 34,1  | Mitochondrial 2oxoglutarate/malate carrier protein <i>Homo sapiens</i>                                 |
| MAGT1_HUMAN |  |  | 3 | 38    | Magnesium transporter protein 1 <i>Homo sapiens</i>                                                    |
| MBB1A_HUMAN |  |  | 3 | 148,9 | Myb binding protein 1A <i>Homo sapiens</i>                                                             |
| MCM3A_HUMAN |  |  | 3 | 218,4 | 80 kDa MCM3 associated protein <i>Homo sapiens</i>                                                     |
| MOGS_HUMAN  |  |  | 3 | 91,9  | Mannosyloligosaccharide glucosidase <i>Homo sapiens</i>                                                |
| MOT1_HUMAN  |  |  | 3 | 53,9  | Monocarboxylate transporter 1 <i>Homo sapiens</i>                                                      |
| MTA2_HUMAN  |  |  | 3 | 75    | Metastasis associated protein MTA2 <i>Homo sapiens</i>                                                 |
| MTDC_HUMAN  |  |  | 3 | 37,9  | Bifunctional methylenetetrahydrofolate dehydrogenase/cyclohydrolase, mitochondrial <i>Homo sapiens</i> |
| MUC18_HUMAN |  |  | 3 | 71,6  | Cell surface glycoprotein MUC18 <i>Homo sapiens</i>                                                    |
| MYC_HUMAN   |  |  | 3 | 48,8  | Myc protooncogene protein <i>Homo sapiens</i>                                                          |
| NAA15_HUMAN |  |  | 3 | 101,3 | Nalphaacetyltransferase 15, NatA auxiliary subunit <i>Homo sapiens</i>                                 |
| NCBP1_HUMAN |  |  | 3 | 91,8  | Nuclear cap binding protein subunit 1 <i>Homo sapiens</i>                                              |
| NEUA_HUMAN  |  |  | 3 | 48,4  | Nacylneuramate cytidyltransferase <i>Homo sapiens</i>                                                  |
| NFS1_HUMAN  |  |  | 3 | 50,2  | Cysteine desulfurase, mitochondrial <i>Homo sapiens</i>                                                |
| NOC4L_HUMAN |  |  | 3 | 58,5  | Nucleolar complex protein 4 homolog <i>Homo sapiens</i>                                                |
| NOLC1_HUMAN |  |  | 3 | 73,6  | Nucleolar and coiled body phosphoprotein 1 <i>Homo sapiens</i>                                         |
| OAT_HUMAN   |  |  | 3 | 48,5  | Ornithine aminotransferase, mitochondrial <i>Homo sapiens</i>                                          |
| P4HA1_HUMAN |  |  | 3 | 61    | Prolyl 4hydroxylase subunit alpha1 <i>Homo sapiens</i>                                                 |
| PDS5A_HUMAN |  |  | 3 | 150,8 | Sister chromatid cohesion protein PDS5 homolog A <i>Homo sapiens</i>                                   |
| PININ_HUMAN |  |  | 3 | 81,6  | Pinin <i>Homo sapiens</i>                                                                              |
| PLMN_HUMAN  |  |  | 3 | 90,6  | Plasminogen <i>Homo sapiens</i>                                                                        |
| PLPL6_HUMAN |  |  | 3 | 150   | Neuropathy target esterase <i>Homo sapiens</i>                                                         |
| PP2BA_HUMAN |  |  | 3 | 58,7  | Serine/threonine protein phosphatase 2B catalytic subunit alpha isoform <i>Homo sapiens</i>            |
| PRP19_HUMAN |  |  | 3 | 55,2  | PremRNA processing factor 19 <i>Homo sapiens</i>                                                       |

|             |    |  |   |       |                                                                                                                |
|-------------|----|--|---|-------|----------------------------------------------------------------------------------------------------------------|
| PSD7_HUMAN  |    |  | 3 | 37    | 26S proteasome nonATPase regulatory subunit 7 Homo sapiens                                                     |
| PSME1_HUMAN |    |  | 3 | 28,7  | Proteasome activator complex subunit 1 <i>Homo sapiens</i>                                                     |
| PUR8_HUMAN  |    |  | 3 | 54,9  | Adenylosuccinate lyase <i>Homo sapiens</i>                                                                     |
| PXDN_HUMAN  |    |  | 3 | 165,3 | Peroxidasin homolog <i>Homo sapiens</i>                                                                        |
| RBBP5_HUMAN |    |  | 3 | 59,2  | Retinoblastomabinding protein 5 Homo sapiens                                                                   |
| RBP2_HUMAN  |    |  | 3 | 358,2 | E3 SUMOprotein ligase RanBP2 Homo sapiens                                                                      |
| RL36A_HUMAN |    |  | 3 | 12,4  | 60S ribosomal protein L36a <i>Homo sapiens</i>                                                                 |
| RPC7_HUMAN  |    |  | 3 | 25,9  | DNAdirected RNA polymerase III subunit RPC7 Homo sapiens                                                       |
| RS13_HUMAN  |    |  | 3 | 17,2  | 40S ribosomal protein S13 <i>Homo sapiens</i>                                                                  |
| RS25_HUMAN  |    |  | 3 | 13,7  | 40S ribosomal protein S25 <i>Homo sapiens</i>                                                                  |
| RS2_HUMAN   |    |  | 3 | 31,3  | 40S ribosomal protein S2 <i>Homo sapiens</i>                                                                   |
| SCRIB_HUMAN |    |  | 3 | 174,9 | Protein scribble homolog <i>Homo sapiens</i>                                                                   |
| SET1A_HUMAN |    |  | 3 | 186   | Histonelysine Nmethyltransferase SETD1A Homo sapiens                                                           |
| SQRD_HUMAN  |    |  | 3 | 50    | Sulfide:quinone oxidoreductase, mitochondrial <i>Homo sapiens</i>                                              |
| SRP54_HUMAN |    |  | 3 | 55,7  | Signal recognition particle 54 kDa protein <i>Homo sapiens</i>                                                 |
| STK24_HUMAN |    |  | 3 | 49,3  | Serine/threonineprotein kinase 24 Homo sapiens                                                                 |
| SUCB1_HUMAN |    |  | 3 | 50,3  | SuccinylCoA ligase [ADPforming] subunit beta, mitochondrial Homo sapiens                                       |
| SUCB2_HUMAN |    |  | 3 | 46,5  | SuccinylCoA ligase [GDPforming] subunit beta, mitochondrial Homo sapiens                                       |
| SYFB_HUMAN  |    |  | 3 | 66,1  | PhenylalaninetRNA ligase beta subunit Homo sapiens                                                             |
| SYNC_HUMAN  |    |  | 3 | 62,9  | AsparaginetRNA ligase, cytoplasmic Homo sapiens                                                                |
| SYQ_HUMAN   |    |  | 3 | 87,8  | GlutaminetRNA ligase Homo sapiens                                                                              |
| TE2IP_HUMAN |    |  | 3 | 44,3  | Telomeric repeatbinding factor 2interacting protein 1 Homo sapiens                                             |
| TMCO1_HUMAN |    |  | 3 | 21,2  | Transmembrane and coiledcoil domaincontaining protein 1 Homo sapiens                                           |
| TOE1_HUMAN  |    |  | 3 | 56,5  | Target of EGR1 protein 1 <i>Homo sapiens</i>                                                                   |
| TRAM1_HUMAN |    |  | 3 | 43,1  | Translocating chainassociated membrane protein 1 Homo sapiens                                                  |
| TRRAP_HUMAN |    |  | 3 | 437,6 | Transformation/transcription domainassociated protein Homo sapiens                                             |
| TWF2_HUMAN  |    |  | 3 | 39,5  | Twinfilin2 Homo sapiens                                                                                        |
| ULA1_HUMAN  |    |  | 3 | 60,2  | NEDD8activating enzyme E1 regulatory subunit Homo sapiens                                                      |
| VTNC_HUMAN  |    |  | 3 | 54,3  | Vitronectin <i>Homo sapiens</i>                                                                                |
| XPO7_HUMAN  |    |  | 3 | 123,9 | Exportin7 Homo sapiens                                                                                         |
| XRN1_HUMAN  |    |  | 3 | 194,1 | 5'3' exoribonuclease 1 Homo sapiens                                                                            |
| YTHD3_HUMAN |    |  | 3 | 63,9  | YTH domain family protein 3 <i>Homo sapiens</i>                                                                |
| ZBED1_HUMAN |    |  | 3 | 78,2  | Zinc finger BED domaincontaining protein 1 Homo sapiens                                                        |
| DI3L2_HUMAN | 24 |  |   | 99,3  | DIS3like exonuclease 2 Homo sapiens                                                                            |
| XPA_HUMAN   | 14 |  |   | 31,4  | DNA repair protein complementing XPA cells Homo sapiens                                                        |
| BTAF1_HUMAN | 13 |  |   | 206,9 | TATAbinding proteinassociated factor 172 Homo sapiens                                                          |
| UNG_HUMAN   | 13 |  |   | 34,6  | UracilDNA glycosylase Homo sapiens                                                                             |
| ALKB2_HUMAN | 11 |  |   | 29,3  | Alphaketoglutaratedependent dioxygenase alkB homolog 2 Homo sapiens                                            |
| ROA2_HUMAN  | 10 |  |   | 37,4  | Heterogeneous nuclear ribonucleoproteins A2/B1 <i>Homo sapiens</i>                                             |
| ROAA_HUMAN  | 10 |  |   | 36,2  | Heterogeneous nuclear ribonucleoprotein A/B <i>Homo sapiens</i>                                                |
| KTHY_HUMAN  | 9  |  |   | 23,8  | Thymidylate kinase <i>Homo sapiens</i>                                                                         |
| HUTH_HUMAN  | 9  |  |   | 72,7  | Histidine ammonialyase Homo sapiens                                                                            |
| ERI1_HUMAN  | 8  |  |   | 40,1  | 3'5' exoribonuclease 1 Homo sapiens                                                                            |
| FOXO1_HUMAN | 8  |  |   | 69,7  | Forkhead box protein O1 <i>Homo sapiens</i>                                                                    |
| HXC10_HUMAN | 7  |  |   | 38,1  | Homeobox protein HoxC10 Homo sapiens                                                                           |
| KLF13_HUMAN | 7  |  |   | 31,2  | Krueppellike factor 13 Homo sapiens                                                                            |
| HM20B_HUMAN | 7  |  |   | 35,8  | SWI/SNFrelated matrixassociated actindependent regulator of chromatin subfamily E member 1related Homo sapiens |

|             |   |  |  |       |                                                                          |
|-------------|---|--|--|-------|--------------------------------------------------------------------------|
| MK67I_HUMAN | 7 |  |  | 34,2  | MKI67 FHA domaininteracting nucleolar phosphoprotein Homo sapiens        |
| RHG04_HUMAN | 7 |  |  | 105   | Rho GTPaseactivating protein 4 Homo sapiens                              |
| IF2B_HUMAN  | 6 |  |  | 38,4  | Eukaryotic translation initiation factor 2 subunit 2 <i>Homo sapiens</i> |
| SCAFB_HUMAN | 6 |  |  | 164,7 | Protein SCAF11 <i>Homo sapiens</i>                                       |
| CEP85_HUMAN | 6 |  |  | 85,6  | Centrosomal protein of 85 kDa <i>Homo sapiens</i>                        |
| CS066_HUMAN | 6 |  |  | 33,1  | UPF0515 protein C19orf66 <i>Homo sapiens</i>                             |
| TXLNA_HUMAN | 6 |  |  | 61,9  | Alphataxilin Homo sapiens                                                |
| NELFE_HUMAN | 5 |  |  | 43,2  | Negative elongation factor E <i>Homo sapiens</i>                         |
| NFIC_HUMAN  | 5 |  |  | 55,7  | Nuclear factor 1 Ctype Homo sapiens                                      |
| TBP_HUMAN   | 5 |  |  | 37,7  | TATAboxbinding protein Homo sapiens                                      |
| HNRL2_HUMAN | 5 |  |  | 85,1  | Heterogeneous nuclear ribonucleoprotein Ulike protein 2 Homo sapiens     |
| SYDE1_HUMAN | 5 |  |  | 79,8  | Rho GTPaseactivating protein SYDE1 Homo sapiens                          |
| T2FB_HUMAN  | 5 |  |  | 28,4  | General transcription factor IIF subunit 2 <i>Homo sapiens</i>           |
| SPD2B_HUMAN | 5 |  |  | 101,6 | SH3 and PX domaincontaining protein 2B Homo sapiens                      |
| ADDA_HUMAN  | 5 |  |  | 81    | Alphaadducin Homo sapiens                                                |
| ALKB5_HUMAN | 5 |  |  | 51,4  | Probable alphaketoglutaratedependent dioxygenase ABH5 Homo sapiens       |
| CASC3_HUMAN | 5 |  |  | 76,3  | Protein CASC3 <i>Homo sapiens</i>                                        |
| CF130_HUMAN | 5 |  |  | 17    | OacetylADPribose deacetylase C6orf130 Homo sapiens                       |
| GTPB1_HUMAN | 5 |  |  | 72,5  | GTPbinding protein 1 Homo sapiens                                        |
| HELB_HUMAN  | 5 |  |  | 123,3 | DNA helicase B <i>Homo sapiens</i>                                       |
| ID1_HUMAN   | 5 |  |  | 16,1  | DNAbinding protein inhibitor ID1 Homo sapiens                            |
| NUMBL_HUMAN | 5 |  |  | 64,9  | Numbllike protein Homo sapiens                                           |
| PURA_HUMAN  | 5 |  |  | 34,9  | Transcriptional activator protein Puralpha Homo sapiens                  |
| RNH2B_HUMAN | 5 |  |  | 35,1  | Ribonuclease H2 subunit B <i>Homo sapiens</i>                            |
| UPP1_HUMAN  | 5 |  |  | 33,9  | Uridine phosphorylase 1 <i>Homo sapiens</i>                              |
| ZN787_HUMAN | 5 |  |  | 40,4  | Zinc finger protein 787 <i>Homo sapiens</i>                              |
| C19L1_HUMAN | 4 |  |  | 60,6  | CWF19like protein 1 Homo sapiens                                         |
| EIF3M_HUMAN | 4 |  |  | 42,5  | Eukaryotic translation initiation factor 3 subunit M <i>Homo sapiens</i> |
| MO4L2_HUMAN | 4 |  |  | 32,3  | Mortality factor 4like protein 2 Homo sapiens                            |
| PDE3A_HUMAN | 4 |  |  | 125   | cGMPinhibited 3',5'cyclic phosphodiesterase A Homo sapiens               |
| THOC4_HUMAN | 4 |  |  | 26,9  | THO complex subunit 4 <i>Homo sapiens</i>                                |
| ARIP4_HUMAN | 4 |  |  | 162,8 | Helicase ARIP4 <i>Homo sapiens</i>                                       |
| BBX_HUMAN   | 4 |  |  | 105,1 | HMG box transcription factor BBX <i>Homo sapiens</i>                     |
| F192A_HUMAN | 4 |  |  | 28,9  | Protein FAM192A <i>Homo sapiens</i>                                      |
| GGA3_HUMAN  | 4 |  |  | 78,3  | ADPriboseylation factorbinding protein GGA3 Homo sapiens                 |
| JUNB_HUMAN  | 4 |  |  | 35,9  | Transcription factor junB Homo sapiens                                   |
| LENG1_HUMAN | 4 |  |  | 30,5  | Leukocyte receptor cluster member 1 <i>Homo sapiens</i>                  |
| MNT_HUMAN   | 4 |  |  | 62,3  | Maxbinding protein MNT Homo sapiens                                      |
| NUD16_HUMAN | 4 |  |  | 21,3  | U8 snoRNAdecapping enzyme Homo sapiens                                   |
| PCBP4_HUMAN | 4 |  |  | 41,5  | Poly(rC)binding protein 4 Homo sapiens                                   |
| PIN4_HUMAN  | 4 |  |  | 13,8  | Peptidylprolyl cistrans isomerase NIMAinteracting 4 Homo sapiens         |
| RNH1_HUMAN  | 4 |  |  | 32,1  | Ribonuclease H1 <i>Homo sapiens</i>                                      |
| SETMR_HUMAN | 4 |  |  | 76,7  | Histonelysine Nmethyltransferase SETMAR Homo sapiens                     |
| SIX4_HUMAN  | 4 |  |  | 82,9  | Homeobox protein SIX4 <i>Homo sapiens</i>                                |
| TAP26_HUMAN | 4 |  |  | 28,7  | Thyroid transcription factor 1associated protein 26 Homo sapiens         |
| TREX2_HUMAN | 4 |  |  | 30,6  | Three prime repair exonuclease 2 <i>Homo sapiens</i>                     |
| ZC12A_HUMAN | 4 |  |  | 65,7  | Ribonuclease ZC3H12A <i>Homo sapiens</i>                                 |
| TOX4_HUMAN  | 3 |  |  | 66,2  | TOX high mobility group box family member 4 <i>Homo sapiens</i>          |

|             |   |  |  |       |                                                                                |
|-------------|---|--|--|-------|--------------------------------------------------------------------------------|
| GLYC_HUMAN  | 3 |  |  | 53,1  | Serine hydroxymethyltransferase, cytosolic <i>Homo sapiens</i>                 |
| SNX5_HUMAN  | 3 |  |  | 46,8  | Sorting nexin5 Homo sapiens                                                    |
| STAT1_HUMAN | 3 |  |  | 87,3  | Signal transducer and activator of transcription 1alpha/beta Homo sapiens      |
| ARPC4_HUMAN | 3 |  |  | 19,7  | Actinrelated protein 2/3 complex subunit 4 Homo sapiens                        |
| ALDH2_HUMAN | 3 |  |  | 56,4  | Aldehyde dehydrogenase, mitochondrial <i>Homo sapiens</i>                      |
| CD027_HUMAN | 3 |  |  | 39,4  | UPF0609 protein C4orf27 <i>Homo sapiens</i>                                    |
| PP1R7_HUMAN | 3 |  |  | 41,6  | Protein phosphatase 1 regulatory subunit 7 <i>Homo sapiens</i>                 |
| NAF1_HUMAN  | 3 |  |  | 53,7  | H/ACA ribonucleoprotein complex noncore subunit NAF1 Homo sapiens              |
| POGK_HUMAN  | 3 |  |  | 69,4  | Pogo transposable element with KRAB domain <i>Homo sapiens</i>                 |
| AIFM2_HUMAN | 3 |  |  | 40,5  | Apoptosisinducing factor 2 Homo sapiens                                        |
| ARL5B_HUMAN | 3 |  |  | 20,4  | ADPribosylation factorlike protein 5B Homo sapiens                             |
| ATF1_HUMAN  | 3 |  |  | 29,2  | Cyclic AMPdependent transcription factor ATF1 Homo sapiens                     |
| CBPA4_HUMAN | 3 |  |  | 47,4  | Carboxypeptidase A4 <i>Homo sapiens</i>                                        |
| CGBP1_HUMAN | 3 |  |  | 18,8  | CGG triplet repeatbinding protein 1 Homo sapiens                               |
| CIRBP_HUMAN | 3 |  |  | 18,6  | Coldinducible RNAbinding protein Homo sapiens                                  |
| DPOE3_HUMAN | 3 |  |  | 16,9  | DNA polymerase epsilon subunit 3 <i>Homo sapiens</i>                           |
| ELOB_HUMAN  | 3 |  |  | 13,1  | Transcription elongation factor B polypeptide 2 <i>Homo sapiens</i>            |
| ERCC1_HUMAN | 3 |  |  | 32,6  | DNA excision repair protein ERCC1 Homo sapiens                                 |
| F122B_HUMAN | 3 |  |  | 26,9  | Protein FAM122B <i>Homo sapiens</i>                                            |
| FOXJ2_HUMAN | 3 |  |  | 62,4  | Forkhead box protein J2 <i>Homo sapiens</i>                                    |
| GEMI_HUMAN  | 3 |  |  | 23,6  | Geminin <i>Homo sapiens</i>                                                    |
| KAP0_HUMAN  | 3 |  |  | 43    | cAMPdependent protein kinase type Ialpha regulatory subunit Homo sapiens       |
| L10K_HUMAN  | 3 |  |  | 10,6  | Leydig cell tumor 10 kDa protein homolog <i>Homo sapiens</i>                   |
| MALT1_HUMAN | 3 |  |  | 92,3  | Mucosaassociated lymphoid tissue lymphoma translocation protein 1 Homo sapiens |
| MEIS1_HUMAN | 3 |  |  | 43    | Homeobox protein Meis1 <i>Homo sapiens</i>                                     |
| MP2K6_HUMAN | 3 |  |  | 37,5  | Dual specificity mitogenactivated protein kinase kinase 6 Homo sapiens         |
| NHP2_HUMAN  | 3 |  |  | 17,2  | H/ACA ribonucleoprotein complex subunit 2 <i>Homo sapiens</i>                  |
| PAF_HUMAN   | 3 |  |  | 12    | PCNAassociated factor Homo sapiens                                             |
| PATL1_HUMAN | 3 |  |  | 86,9  | Protein PAT1 homolog 1 <i>Homo sapiens</i>                                     |
| PI4KB_HUMAN | 3 |  |  | 91,4  | Phosphatidylinositol 4kinase beta Homo sapiens                                 |
| PITX1_HUMAN | 3 |  |  | 34,1  | Pituitary homeobox 1 <i>Homo sapiens</i>                                       |
| PSIP1_HUMAN | 3 |  |  | 60,1  | PC4 and SFRS1interacting protein Homo sapiens                                  |
| R51A1_HUMAN | 3 |  |  | 38,5  | RAD51associated protein 1 Homo sapiens                                         |
| RBM24_HUMAN | 3 |  |  | 24,8  | RNAbinding protein 24 Homo sapiens                                             |
| RNH2C_HUMAN | 3 |  |  | 17,8  | Ribonuclease H2 subunit C <i>Homo sapiens</i>                                  |
| RPP25_HUMAN | 3 |  |  | 20,6  | Ribonuclease P protein subunit p25 <i>Homo sapiens</i>                         |
| SNX8_HUMAN  | 3 |  |  | 52,6  | Sorting nexin8 Homo sapiens                                                    |
| SNX9_HUMAN  | 3 |  |  | 66,6  | Sorting nexin9 Homo sapiens                                                    |
| TNAP2_HUMAN | 3 |  |  | 72,7  | Tumor necrosis factor alpha-induced protein 2 Homo sapiens                     |
| TOPK_HUMAN  | 3 |  |  | 36,1  | Lymphokineactivated killer Tcelloriginated protein kinase Homo sapiens         |
| TUT4_HUMAN  | 3 |  |  | 185,2 | Terminal uridylyltransferase 4 <i>Homo sapiens</i>                             |
| XPF_HUMAN   | 3 |  |  | 104,5 | DNA repair endonuclease XPF <i>Homo sapiens</i>                                |
| ZN143_HUMAN | 3 |  |  | 68,9  | Zinc finger protein 143 <i>Homo sapiens</i>                                    |
| ZN148_HUMAN | 3 |  |  | 89    | Zinc finger protein 148 <i>Homo sapiens</i>                                    |
